# Supplementary material for: Evaluation of Physicochemical Characteristics in Drinking Water Sources Emphasized on Fluoride: A Case Study of Yancheng, China
Source: PubMed Central journal article supplement (PMC6466306; doi:10.3390/ijerph16061030), 2019-03-21
Supplement: ijerph-16-01030-s001.pdf [file ijerph-16-01030-s001.pdf]

Table S1 Fluoride exposure levels in three water sources of Yancheng City. ( $\mu\text{g kg}^{-1} \text{ day}^{-1}$ ).

|      |      | Tongyu River   |                         |                         |                         | Mangshe River  |                         |                         |                         | Yanlong Lake   |                         |                         |                         |
|------|------|----------------|-------------------------|-------------------------|-------------------------|----------------|-------------------------|-------------------------|-------------------------|----------------|-------------------------|-------------------------|-------------------------|
|      |      | F <sup>-</sup> | <i>ADD</i> <sub>1</sub> | <i>ADD</i> <sub>2</sub> | <i>ADD</i> <sub>3</sub> | F <sup>-</sup> | <i>ADD</i> <sub>1</sub> | <i>ADD</i> <sub>2</sub> | <i>ADD</i> <sub>3</sub> | F <sup>-</sup> | <i>ADD</i> <sub>1</sub> | <i>ADD</i> <sub>2</sub> | <i>ADD</i> <sub>3</sub> |
| 2012 | Max  | 0.61           | 92                      | 61                      | 20                      | 0.67           | 101                     | 67                      | 22                      | 0.80           | 120                     | 80                      | 27                      |
|      | Min  | 0.47           | 71                      | 47                      | 16                      | 0.42           | 63                      | 42                      | 14                      | 0.58           | 87                      | 58                      | 19                      |
|      | Mean | 0.54           | 81                      | 54                      | 18                      | 0.58           | 87                      | 58                      | 19                      | 0.70           | 105                     | 70                      | 23                      |
| 2013 | Max  | 0.57           | 86                      | 57                      | 19                      | 0.61           | 92                      | 61                      | 20                      | 0.68           | 102                     | 68                      | 23                      |
|      | Min  | 0.45           | 68                      | 45                      | 15                      | 0.4            | 60                      | 40                      | 13                      | 0.47           | 71                      | 47                      | 16                      |
|      | Mean | 0.52           | 78                      | 52                      | 17                      | 0.51           | 77                      | 51                      | 17                      | 0.55           | 83                      | 55                      | 18                      |
| 2014 | Max  | 0.68           | 102                     | 68                      | 23                      | 0.71           | 107                     | 71                      | 24                      | 0.95           | 143                     | 95                      | 32                      |
|      | Min  | 0.46           | 69                      | 46                      | 15                      | 0.45           | 68                      | 45                      | 15                      | 0.42           | 63                      | 42                      | 14                      |
|      | Mean | 0.56           | 84                      | 56                      | 19                      | 0.54           | 81                      | 54                      | 18                      | 0.56           | 84                      | 56                      | 19                      |
| 2015 | Max  | 0.66           | 99                      | 66                      | 22                      | 0.66           | 99                      | 66                      | 22                      | 0.71           | 107                     | 71                      | 24                      |
|      | Min  | 0.41           | 62                      | 41                      | 14                      | 0.43           | 65                      | 43                      | 14                      | 0.46           | 69                      | 46                      | 15                      |
|      | Mean | 0.54           | 80                      | 54                      | 18                      | 0.53           | 79                      | 53                      | 18                      | 0.54           | 82                      | 54                      | 18                      |

Notes: *ADD*<sub>1</sub>, *ADD*<sub>2</sub>, and *ADD*<sub>3</sub> refer to fluoride exposure level for infants, children, and adults, respectively.
